# Supplementary material for: Differential diagnosis between low-risk and high-risk thymoma: Comparison of diagnostic performance of radiologists with and without deep learning model
Source: PubMed Central journal article supplement — Acta Radiol Open. 2024 Oct 4;13(10):20584601241288509. doi: 10.1177/20584601241288509 (PMC11457241; doi:10.1177/20584601241288509), 2024-10-04

Patients with CT examinations prior to surgery for Thymoma at our institution between January 2005 and November 2016 (n = 185 )

Excluded patients (n = 26 );  
Reasons are as follows;  
• Cases with plain CT only: n = 8  
• Contrast enhanced CT only: n = 3  
• Different timing of contrast-enhanced CT: n = 3  
• Dual energy CT: n = 12

**Final study population**  
(n = 159 [160 tumors])

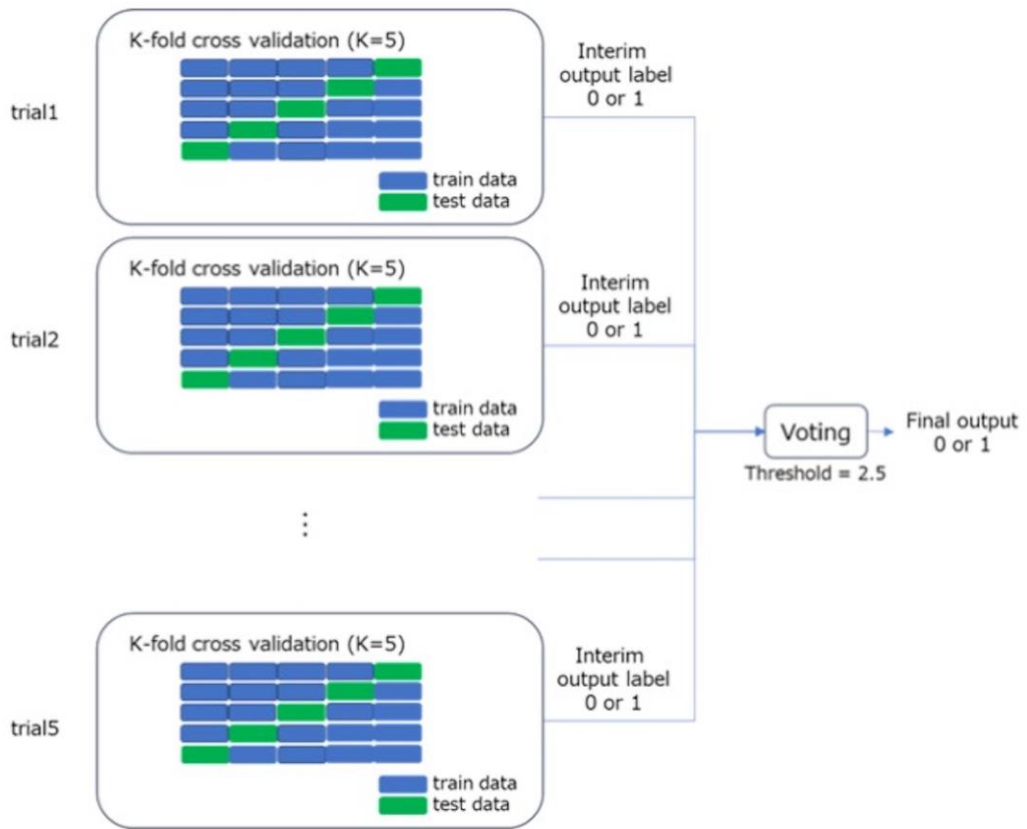

Supplement: sj-pdf-1-arr-10.1177_20584601241288509.pdf [file sj-pdf-1-arr-10.1177_20584601241288509.pdf]
